# Supplementary material for: Bromodomain Containing 9 Regulates Signaling Pathways and Reprograms the Epigenome in Human Uterine Fibroid Cells
Source: Preprints.org preprint supplement (doi:10.20944/preprints202307.1154.v1), 2023-07-18
Supplement: Supplementary file 1 [file supplementary]

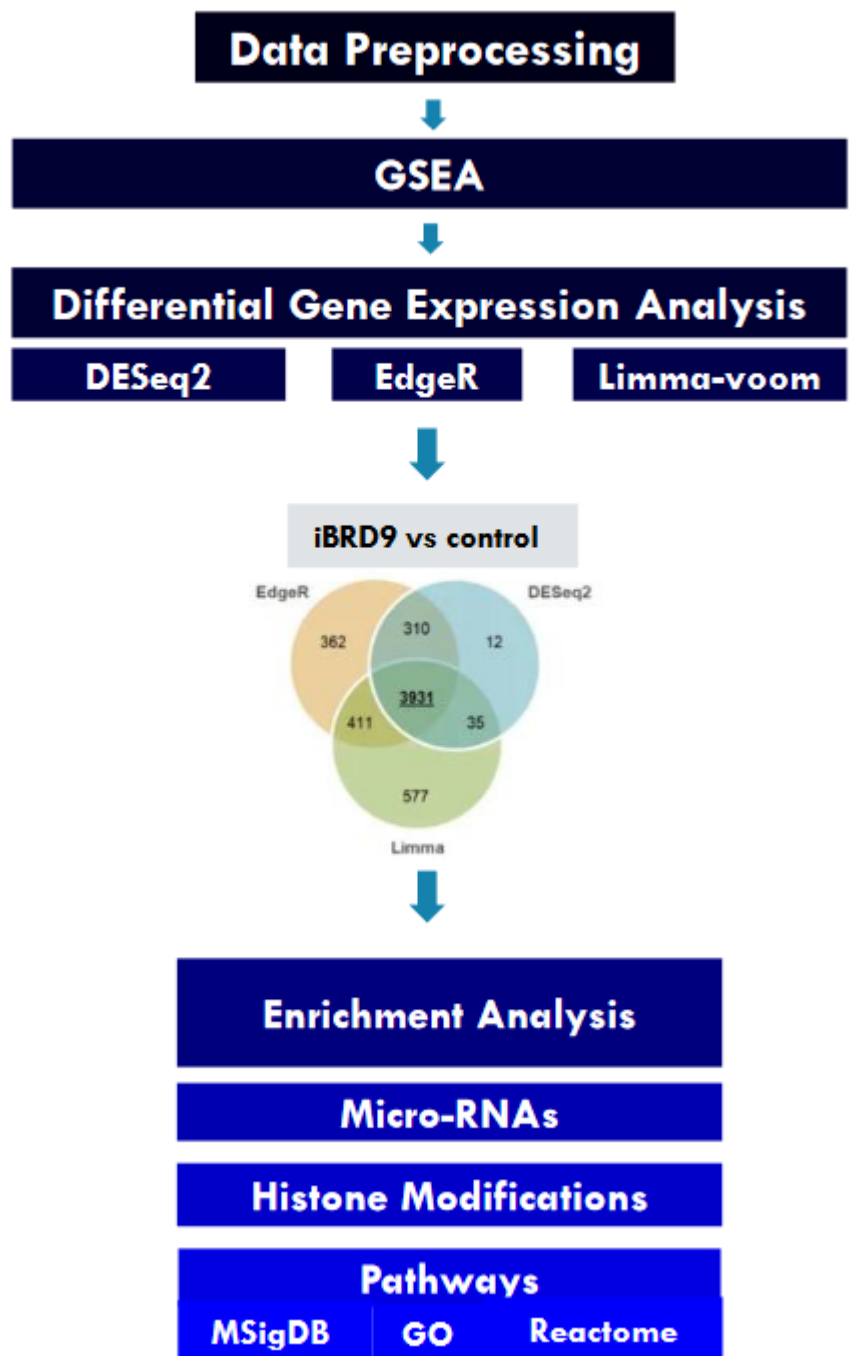

**Figure S1.** Flowchart of experimental design and bioinformatics analyses.

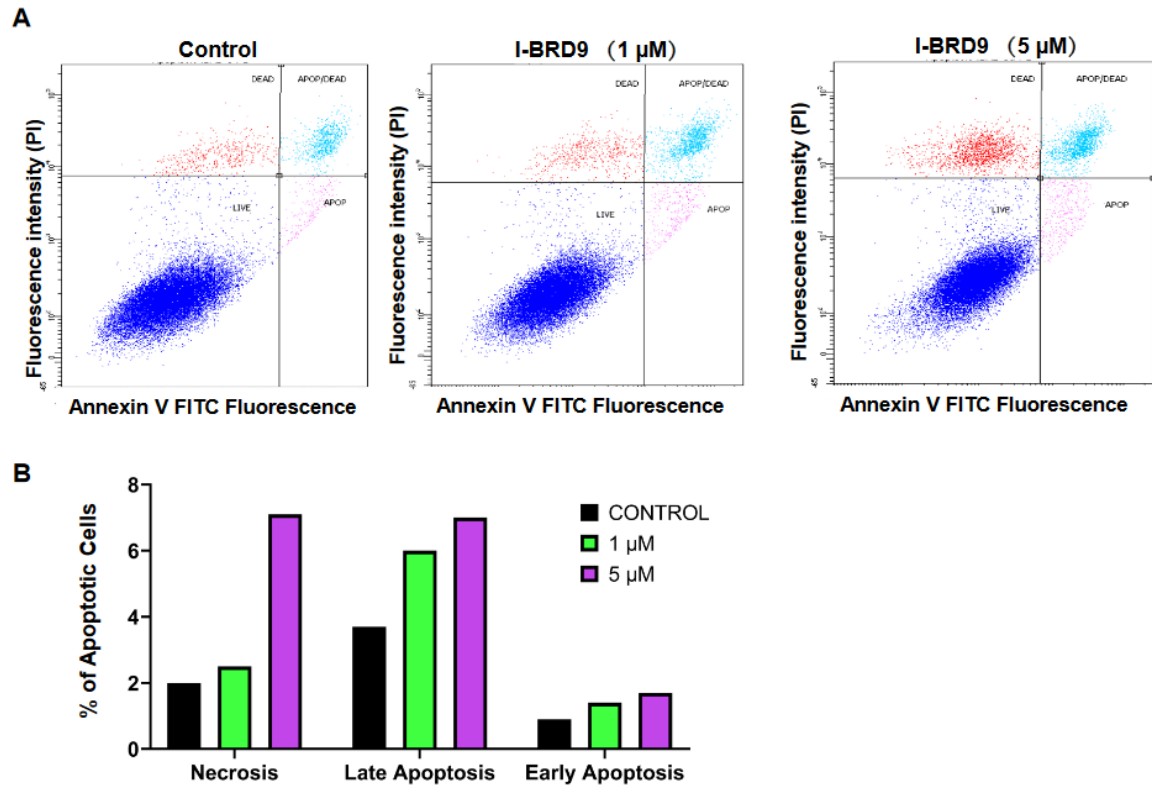

**Figure S2.** Flow cytometric analysis of UF cell apoptosis and necrosis after 24 h treatment with I-BRD9. HuLM cells were treated with 1 and 5  $\mu$ M I-BRD9 or vehicle (DMSO) for 24 h and subjected to fluorescein-labeled Annexin V assay. **(A)** Images of flow cytometric analysis in the HuLM cells treated with vehicle, 1  $\mu$ M I-BRD9 and 5  $\mu$ M I-BRD9; **(B)** Percentages of necrosis, late and early apoptosis in HuLM cells treated with 1  $\mu$ M and 5  $\mu$ M of I-BRD9 treatment.

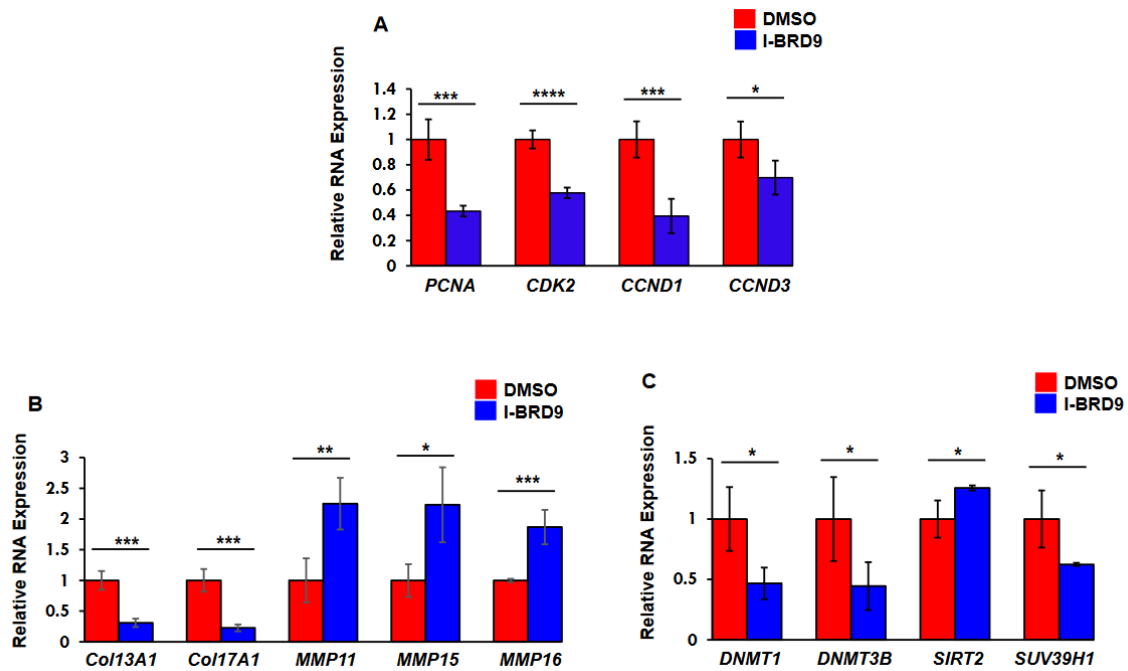

**Figure S3.** Quantitative Real-time PCR was performed to determine the relative RNA levels of genes. **(A)** *CDK2*, *CCND1*, *CCND3*, *PCNA*; **(B)** *Col13A1*, *Col17A1*, *MMP11*, *MMP15*, *MMP16*; **(C)** *DNMT1*, *DNMT3B*, *SIRT2*, *SUV39H1*

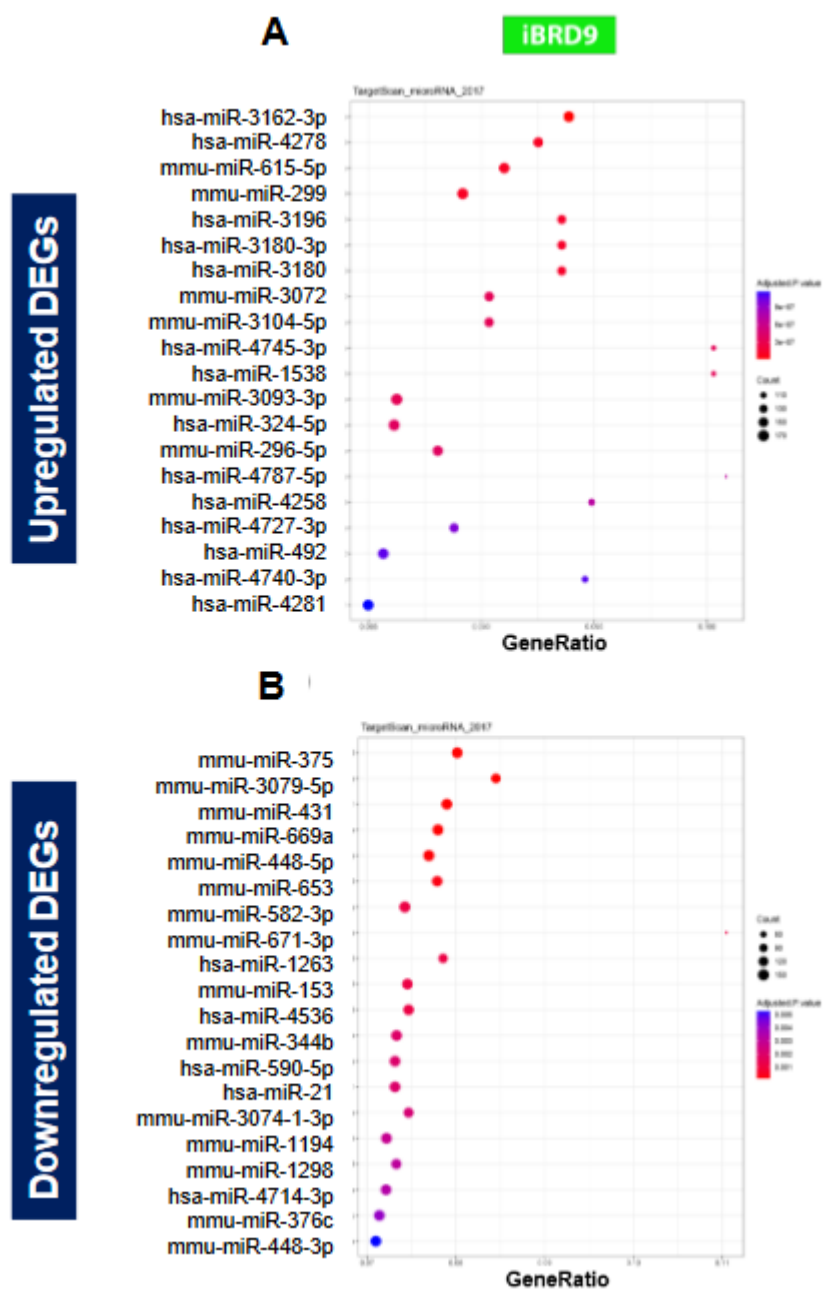

**Figure S4. MicroRNAs enrichment analysis.** The dot plots showed the top twenty enrichment Terms for microRNAs associated with up DEGs, (A) MicroRNAs associated with up DEGs in response to I-BRD9 treatment; (B) MicroRNAs associated with down DEGs in response to I-BRD9 treatment.
